# Supplementary material for: An miRNA fingerprint using neural-enriched extracellular vesicles from blood plasma: towards a biomarker for amyotrophic lateral sclerosis/motor neuron disease
Source: PubMed Central journal article supplement (PMC7333885; doi:10.1098/rsob.200116), 2020-06-24
Supplement: rsob200116supp1.pdf [file rsob200116supp1.pdf]

Banack SA, Dunlop RA, Cox PA, 2020, Identification of a miRNA fingerprint using neural-enriched extracellular vesicles from blood plasma: toward a biomarker for amyotrophic lateral sclerosis/ motor neuron disease (ALS/MND), Royal Society Open Biology, DOI 10.1098/rsob.20200116

Target sequences of eight identified miRNA useful to differentiate ALS/MND patients from controls.

| <b>miRNA number</b> | <b>miRNA ID</b> | <b>Target sequence</b>  |
|---------------------|-----------------|-------------------------|
| 1                   | hsa-miR-146a-5p | UGAGAACUGAAUCCAUGGGUU   |
| 2                   | hsa-miR-199a-3p | ACAGUAGUCUGCACAUUGGUUA  |
| 3                   | hsa-miR-4454    | GGAUCCGAGUCACGGCACCA    |
| 4                   | hsa-miR-10b-5p  | UACCCUGUAGAACCGAAUUUGUG |
| 5                   | hsa-miR-29b-3p  | UAGCACCAUUUGAAAUCAGUGUU |
| 6                   | hsa-miR-151a-3p | CUAGACUGAAGCUCCUUGAGG   |
| 7                   | hsa-miR-151a-5p | UCGAGGAGCUCACAGUCUAGU   |
| 8                   | hsa-miR-199a-5p | CCCAGUGUUCAGACUACCUGUUC |
